# Supplementary material
Source: PubMed Central journal article supplement (PMC10698682)
Supplement: NIHMS1936378-supplement-Supporting_Information.pdf [file NIHMS1936378-supplement-Supporting_Information.pdf]

## Supporting Information

Development of a Headspace Sampling-Gas Chromatography-Mass Spectrometry Method for the Analysis of Fireground Contaminants from Firefighter Turnout Materials

*Adhiraj Shinde, R. Bryan Ormond\**

The chemical structures for the selected fireground contaminants that are analyzed in the manuscript are as follows:

| Compound Name                     | Chemical Structure                                                                  | Compound Name                  | Chemical Structure                                                                    |
|-----------------------------------|-------------------------------------------------------------------------------------|--------------------------------|---------------------------------------------------------------------------------------|
| Phenol                            | 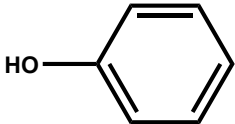   | Naphthalene (NA)               |    |
| 2,4,6-Trichlorophenol (2,4,6-TCP) |    | Phenanthrene (PA)              |    |
| Pentachlorophenol (PCP)           |   | Pyrene (PY)                    |   |
| Di-butyl phthalate (DBP)          |  | Benzo[a]pyrene (BaP)           |  |
| Benzyl butyl phthalate (BBP)      |  | Di-ethylhexyl phthalate (DEHP) |  |
